# Supplementary material for: Protective effect of astaxanthin nanoemulsion on mammalian inner ear hair cells
Source: PeerJ. 2023 Sep 8;11:e15562. doi: 10.7717/peerj.15562 (PMC10494832; doi:10.7717/peerj.15562)
Supplement: Supplemental Information 1 [file peerj-11-15562-s001.xlsx]

## Sheet: Sheet1
	Amount of substance	Measurement wavelength	absorbance	Concentration calculated from absorbance
Nanoemulsion (Fujifilm)
	1 mM	480 nm	2.35	1068.18	µM
	100 µM	480 nm	1.095	497.727	µM
	10 µM	480 nm	0.12	54.5455	µM
	1 µM	480 nm	0.016	7.27273	µM
	100 nM	480 nm	0.002	0.909091	µM
	10 nM	480 nm	-0.001	-0.454545	µM
	1 nM	480 nm	0.002	0.909091	µM
Ethanol solution
	1 mM	480 nm	0.484	220	µM
	100 µM	480 nm	0.222	100.909	µM
	10 µM	480 nm	0.076	34.5455	µM
	1 µM	480 nm	0.018	8.18182	µM
	100 nM	480 nm	0.01	4.54545	µM
	10 nM	480 nm	0.012	5.45455	µM
	1 nM	480 nm	0.006	2.72727	µM
Aqueous solusion
	1 mM	480 nm	0.003	1.36364	µM
	100 µM	480 nm	0.001	0.454545	µM
	10 µM	480 nm	0.002	0.909091	µM
	1 µM	480 nm	0.006	2.72727	µM
