# Supplementary material for: Protective effect of astaxanthin nanoemulsion on mammalian inner ear hair cells
Source: PeerJ. 2023 Sep 8;11:e15562. doi: 10.7717/peerj.15562 (PMC10494832; doi:10.7717/peerj.15562)
Supplement: Supplemental Information 2 [file peerj-11-15562-s002.xlsx]

## Sheet: Sheet1
Label	Extrastriolar-Ave		Control	Neomycin (2 mM)	Neomycin (2 mM), Ax (1 µM)	Neomycin (2 mM), Ax (10 µM)	Neomycin (2 mM), Ax (100 µM)		Co-SD	neo-SD	neoax1-SD	neoax10-SD	neoAX100-SD
Control	9.7		9.13333	3.55	4.35	6.25	6.56667		0.828654	1.12383	1.0226	0.840833	0.791623
Control	9.6
Control	9.8
Control	7.8
Control	9.5
Control	8.4
Neomycin (2 mM)	4.9
Neomycin (2 mM)	2.2
Neomycin (2 mM)	3.8
Neomycin (2 mM)	3.8
Neomycin (2 mM)	2.2
Neomycin (2 mM)	4.4
Neomycin (2 mM), Ax (1 µM)	4
Neomycin (2 mM), Ax (1 µM)	4.9
Neomycin (2 mM), Ax (1 µM)	2.9
Neomycin (2 mM), Ax (1 µM)	4.8
Neomycin (2 mM), Ax (1 µM)	5.6
Neomycin (2 mM), Ax (1 µM)	4.8
Neomycin (2 mM), Ax (1 µM)	2.8
Neomycin (2 mM), Ax (1 µM)	5
Neomycin (2 mM), Ax (10 µM)	6.6
Neomycin (2 mM), Ax (10 µM)	6.7
Neomycin (2 mM), Ax (10 µM)	6.9
Neomycin (2 mM), Ax (10 µM)	4.6
Neomycin (2 mM), Ax (10 µM)	6.2
Neomycin (2 mM), Ax (10 µM)	6.5
Neomycin (2 mM), Ax (100 µM)	5.9
Neomycin (2 mM), Ax (100 µM)	6.8
Neomycin (2 mM), Ax (100 µM)	6.4
Neomycin (2 mM), Ax (100 µM)	5.5
Neomycin (2 mM), Ax (100 µM)	7.2
Neomycin (2 mM), Ax (100 µM)	7.6
