# Supplementary material for: Protective effect of astaxanthin nanoemulsion on mammalian inner ear hair cells
Source: PeerJ. 2023 Sep 8;11:e15562. doi: 10.7717/peerj.15562 (PMC10494832; doi:10.7717/peerj.15562)
Supplement: Supplemental Information 3 [file peerj-11-15562-s003.xlsx]

## Sheet: Results
		Area	Mean	XM	YM	Major	Minor	Angle		Average	SD	SE
control	1	558	18.82	217.6	55.18	27.31	26.01	0		19.5217	1.33708	0.54586
control	2	466	18.83	353.35	40.14	26.87	22.08	90
control	3	380	18.44	174.13	123.26	24.1	20.08	90
control	4	512	19.32	405.56	199.67	28.26	23.07	0
control	5	430	22.12	303.62	257.86	25.88	21.16	0
control	6	532	19.6	63.7	340.21	27.98	24.21	0
Neomycin	7	434	39.36	683.32	92.73	25.07	22.04	0		29.2633	9.20925	3.75966
Neomycin	8	420	39.1	642.76	185.43	24.01	22.28	0
Neomycin	9	688	32.82	742.27	350.99	31.25	28.04	0
Neomycin	10	330	22.88	844.43	178.32	21.85	19.23	90
Neomycin	11	344	17.13	1035.44	141.27	21.99	19.91	0
Neomycin	12	590	24.29	995.58	298.63	30.1	24.96	90
Neo+Ax	13	590	19.46	1501.18	47.2	30.1	24.96	0		18.2917	1.2258	0.500429
Neo+Ax	14	413	19.16	1396.53	145.52	24.9	21.12	0
Neo+Ax	15	254	16.12	1304.26	243	22.75	14.22	0
Neo+Ax	16	420	18.72	1506.1	289.13	24.01	22.28	0
Neo+Ax	17	300	18.62	1595.5	271.18	20.09	19.01	90
Neo+Ax	18	448	17.67	1750.06	136.16	23.88	23.88	0
