# Supplementary material for: Protective effect of astaxanthin nanoemulsion on mammalian inner ear hair cells
Source: PeerJ. 2023 Sep 8;11:e15562. doi: 10.7717/peerj.15562 (PMC10494832; doi:10.7717/peerj.15562)
Supplement: Supplemental Information 4 [file peerj-11-15562-s004.xlsx]

## Sheet: Sheet1
	cont before	4kHz	8kHz	16kHz	32kHz		AST before	4kHz	8kHz	16kHz	32kHz
	①	80	65	45	80		①	80	55	55	90
	②	80	75	50	65		②	70	60	35	50
	③	55	40	30	50		③	45	30	20	35
	④	75	60	35	75		④	70	60	50	65
	⑤	60	45	30	50		⑤	60	75	80	40
	⑥	55	55	25	25		⑥	75	65	20	25
	⑦	60	45	20	55		⑦	65	50	35	55
		4kHz	8kHz	16kHz	32kHz			4kHz	8kHz	16kHz	32kHz
	average	66.4286	55	33.5714	57.1429		average	66.4286	56.4286	42.1429	51.4286
	SD	11.4434	12.5831	10.6904	18.452		SD	11.4434	14.0577	21.3809	21.5473
	cont after	4kHz	8kHz	16kHz	32kHz		AST after	4kHz	8kHz	16kHz	32kHz
	①	105	105	55	105		①	105	90	55	95
	②	105	95	85	95		②	80	95	70	60
	③	105	90	85	95		③	105	105	90	90
	④	105	105	75	100		④	105	80	50	80
	⑤	105	105	105	105		⑤	90	105	80	95
	⑥	105	105	90	90		⑥	105	105	55	60
	⑦	105	105	105	105		⑦	105	105	105	105
		4kHz	8kHz	16kHz	32kHz			4kHz	8kHz	16kHz	32kHz
	average	105	101.429	85.7143	99.2857		average	99.2857	97.8571	72.1429	83.5714
	SD	0	6.26783	17.4233	6.07493		SD	10.177	9.9403	20.5866	17.7281
