# Supplementary material for: Protective effect of astaxanthin nanoemulsion on mammalian inner ear hair cells
Source: PeerJ. 2023 Sep 8;11:e15562. doi: 10.7717/peerj.15562 (PMC10494832; doi:10.7717/peerj.15562)
Supplement: Supplemental Information 9 — Raw data of the rate of outer hair cell loss in the middle layer of the cochlea was shown. [file peerj-11-15562-s009.xlsx]

## Sheet: Sheet1
	Middle
	(second rotation of the cochlea)
		loss/60	Cont	AST				loss(%)	Cont	AST
		①	3	3				①	5	5
		②	48	10				②	80	16.6
		③	17	4				③	28.3	6.6
		④	52	4				④	86	6.6
		⑤	6	1				⑤	10	1.6
		⑥	6	1				⑥	10	1.6
		⑦	12	9				⑦	20	15
								average	34.1857	7.57143
								SD	34.257	6.00714
