# Supplementary material for: Protective effect of astaxanthin nanoemulsion on mammalian inner ear hair cells
Source: PeerJ. 2023 Sep 8;11:e15562. doi: 10.7717/peerj.15562 (PMC10494832; doi:10.7717/peerj.15562)
Supplement: Supplemental Information 10 — Raw data of the rate of inner and outer hair cell loss in all layers of the cochlea was shown. [file peerj-11-15562-s010.xlsx]

## Sheet: Sheet1
	IHC	line 20
		Middle
		(second rotation of the cochlea)
		loss(%)	Cont	AST				loss/20	Cont	AST				Control	AST
		①	0	0				①	0	0			middle	0.714286	0
		②	1	0				②	5	0			SE	0.714286	0
		③	0	0				③	0	0
		④	0	0				④	0	0
		⑤	0	0				⑤	0	0
		⑥	0	0				⑥	0	0
		⑦	0	0				⑦	0	0
								average	0.714286	0
		average	0.142857	0				SD	1.88982	0
		SD	0.377964	0				SE	0.714286	0
		basal
		(first rotation of the cochlea)
		loss(%)	Cont	AST				loss/20	Cont	AST				Control	AST
		①	0	0				①	0	0			basal	0	0
		②	0	0				②	0	0			SE	0	0
		③	0	0				③	0	0
		④	0	0				④	0	0
		⑤	0	0				⑤	0	0
		⑥	0	0				⑥	0	0
		⑦	0	0				⑦	0	0
		average	0	0
		SD	0	0
		SE	0	0
		appical
		(third rotation of the cochlea)
		loss(%)	Cont	AST				loss/20	Cont	AST				Control	AST
		①	0	0				①	0	0			apical	0	0.714286
		②	0	0				②	0	0			SE	0	0.714286
		③	0	1				③	0	5
		④	0	0				④	0	0
		⑤	0	0				⑤	0	0
		⑥	0	0				⑥	0	0
		⑦	0	0				⑦	0	0
										0.714286
		average	0	0.142857						1.88982
		SD	0	0.377964						0.714286
		SE	0	0.142857
